# Supplementary material for: Effects of oral contraceptives on metabolic parameters in adult premenopausal women: a meta-analysis
Source: PubMed Central journal article supplement (PMC7576645; doi:10.1530/ec-20-0423), 2020-09-10

**Supplemental Figure 1.** Funnel plots of mean weighted difference *versus* standard error of the weighted mean difference for metabolic outcomes in studies of oral contraceptives containing cyproterone. Egger's and Begg's tests were only calculated for outcomes in which there were at least 5 observations (studies).

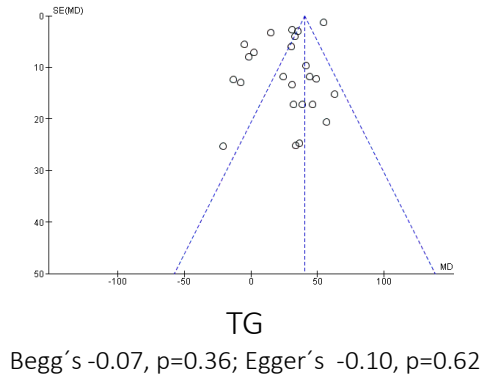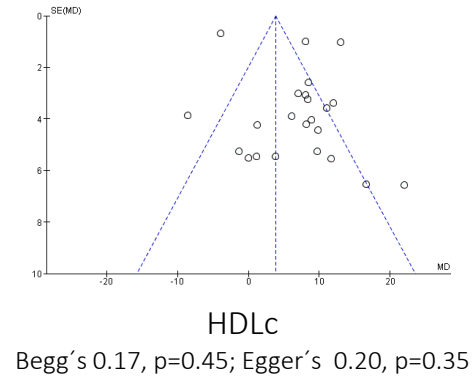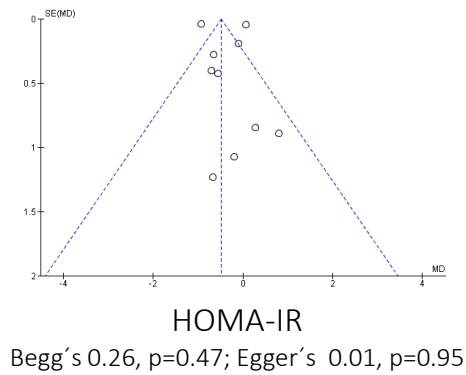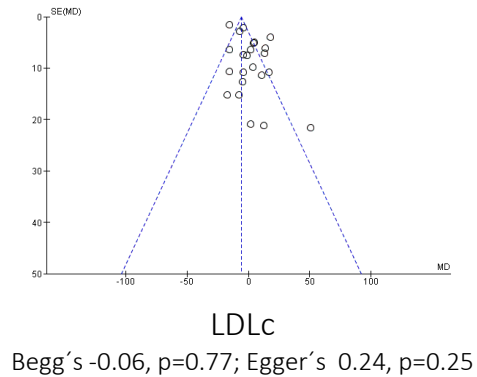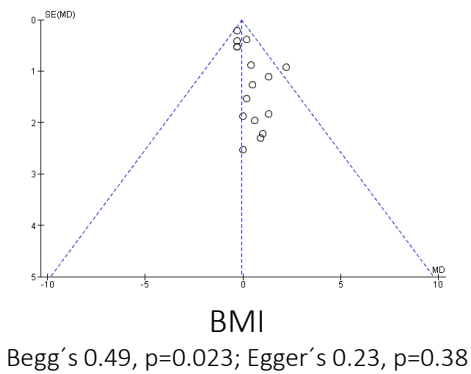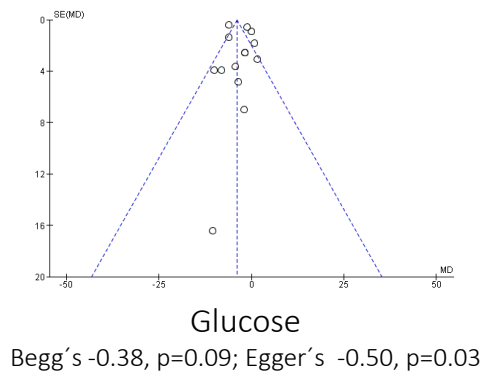

Supplement: supplementary_figure_1.pdf [file supplementary_figure_1.pdf]
