# Supplementary material for: Effects of oral contraceptives on metabolic parameters in adult premenopausal women: a meta-analysis
Source: PubMed Central journal article supplement (PMC7576645; doi:10.1530/ec-20-0423), 2020-09-10

**Supplemental Figure 6.** Trim-and-fill analysis of the four intervention-outcome pairs that showed indication of publication bias. Upper-left: Desogestrel and LDLc, upper-right: Drospirenone and TG, lower-left: Drospirenone and HDLc, lower-right: Levonorgestrel and LDLc. Only the modification of HDLc after drospirenone use was affected by publication bias adjustment.

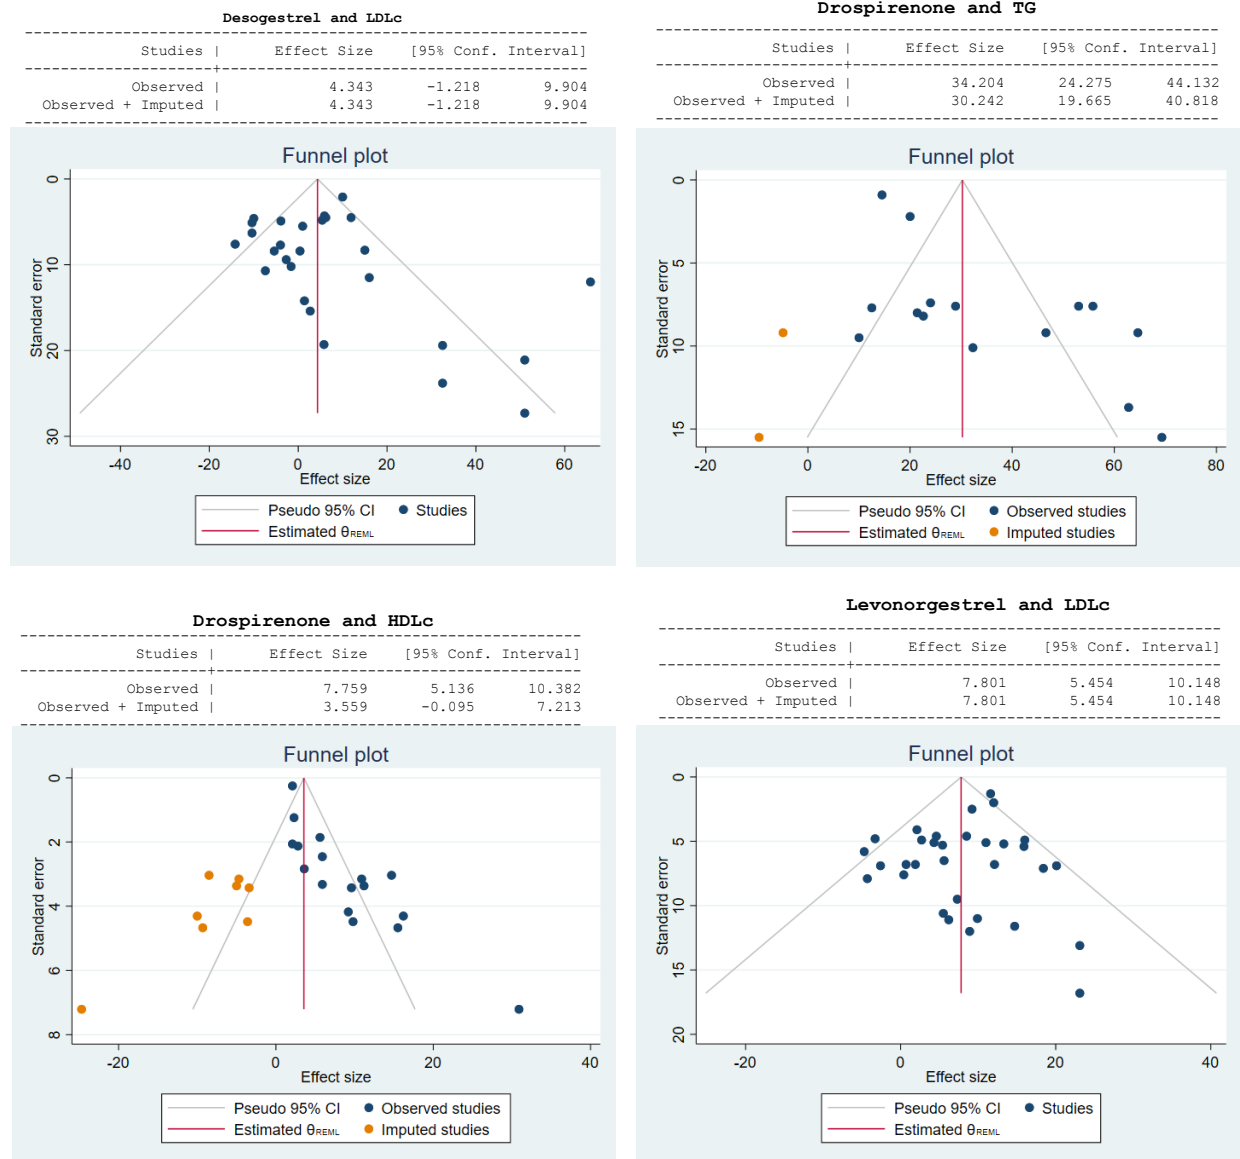

Supplement: supplementary_figure_6.pdf [file supplementary_figure_6.pdf]
