# Supplementary material for: Effects of oral contraceptives on metabolic parameters in adult premenopausal women: a meta-analysis
Source: PubMed Central journal article supplement (PMC7576645; doi:10.1530/ec-20-0423), 2020-09-10
Supplement: supplementary_table_1.pdf [file supplementary_table_1.pdf]

| <b>Supplementary Table 1. Search strategy.</b> |                                    |
|------------------------------------------------|------------------------------------|
| <b>Embase</b>                                  | <b>Medline</b>                     |
| 1. oral contraceptive agent/                   | 1. Contraceptives, Oral, Combined/ |
| 2. cyproterone/                                | 2. Cyproterone/                    |
| 3. cyproterone acetate plus ethinylestradiol/  | 3. Desogestrel/                    |
| 4. desogestrel/                                | 4. Chlormadinone Acetate/          |
| 5. desogestrel plus ethinylestradiol/          | 5. dienogest.nm.                   |
| 6. chlormadinone acetate/                      | 6. drospirenone.nm.                |
| 7. dienogest/                                  | 7. gestodene.nm.                   |
| 8. drospirenone/                               | 8. Levonorgestrel/                 |
| 9. gestodene/                                  | 9. nomegestrol acetate.nm.         |
| 10. levonorgestrel/                            | 10. norgestimate.nm.               |
| 11. nomegestrol acetate/                       | 11. or/1-10                        |
| 12. norgestimate/                              | 12. norgestimate.mp.               |
| 13. or/1-12                                    | 13. nomegestrol.mp.                |
| 14. norgestimate.mp.                           | 14. levonorgestrel.mp.             |
| 15. nomegestrol.mp.                            | 15. gestodene.mp.                  |
| 16. levonorgestrel.mp.                         | 16. drospirenone.mp.               |
| 17. gestodene.mp.                              | 17. dienogest.mp.                  |
| 18. drospirenone.mp.                           | 18. desogestrel.mp.                |
| 19. dienogest.mp.                              | 19. chlormadinone.mp.              |
| 20. desogestrel.mp.                            | 20. cyproterone.mp.                |
| 21. chlormadinone.mp.                          | 21. or/12-20                       |
| 22. cyproterone.mp.                            | 22. 11 or 21                       |
| 23. or/14-22                                   | 23. cholesterol, ldl/              |
| 24. low density lipoprotein cholesterol/       | 24. triglycerides/                 |
| 25. high density lipoprotein cholesterol/      | 25. cholesterol, hdl/              |
| 26. triacylglycerol/                           | 26. insulin resistance/            |
| 27. insulin resistance/                        | 27. body mass index/               |
| 28. body mass/                                 | 28. blood glucose/                 |
| 29. glucose blood level/                       | 29. or/23-28                       |
| 30. or/24-29                                   | 30. ldl cholesterol.mp.            |
| 31. ldl cholesterol*.mp.                       | 31. triglyceride*.mp.              |
| 32. tri-glycerides.mp.                         | 32. tri-glyceride*.mp.             |
| 33. triglycerides.mp.                          | 33. hdl cholesterol*.mp.           |
| 34. hdl cholesterol*.mp.                       | 34. homa-IR.mp.                    |
| 35. homa-IR.mp.                                | 35. body-mass ind*.mp.             |
| 36. body mass ind*.mp.                         | 36. fasting plasma glucose.mp.     |
| 37. fasting plasma glucose.mp.                 | 37. or/30-35                       |
| 38. or/31-37                                   | 38. lipids/                        |
| 39. lipid/                                     | 39. lipid.mp.                      |
| 40. lipid.mp.                                  | 40. lipids.mp.                     |
| 41. lipids.mp.                                 | 41. lipoproteins/                  |
| 42. lipoprotein/                               | 42. lipoproteins, IDL/             |
| 43. low density lipoprotein/                   | 43. lipoproteinsn, LDL/            |
| 44. intermediate density lipoprotein/          | 44. lipoproteins, HDL/             |
| 45. high density lipoprotein/                  | 45. lipoproteins, VLDL/            |
| 46. very low density lipoprotein/              | 46. lipoprotein*.mp.               |
| 47. lipoprotein*.mp.                           | 47. triacetin.mp.                  |
| 48. triacetin/                                 | 48. triolein.mp.                   |
| 49. triacetin.mp.                              | 49. triacetin/                     |
| 50. triolein/                                  | 50. triolein/                      |
| 51. triolein.mp.                               | 51. triacylglycerol*.mp.           |

|                                                                           |                                                                         |
|---------------------------------------------------------------------------|-------------------------------------------------------------------------|
| 52. triacylglycerol*.mp.                                                  | 52. (HDL or LDL or VLDL or IDL or TG or TAG).mp.                        |
| 53. (HDL or LDL or IDL or VLDL or TG or TAG).mp.                          | 53. cholesterol*.mp.                                                    |
| 54. cholesterol*.mp.                                                      | 54. apolipoproteins a/                                                  |
| 55. apolipoprotein/                                                       | 55. apolipoproteins a-i/                                                |
| 56. apolipoprotein A/                                                     | 56. (apo* a1 or apo*a 1 or apo* a i or apo* ai).mp.                     |
| 57. apolipoprotein A1/                                                    | 57. (proapolipoprotein adj1 (ai or a1 or a i or a-1)).mp.               |
| 58. apolipoprotein B/                                                     | 58. apolipoproteins B/                                                  |
| 59. apolipoprotein B100/                                                  | 59. apo* b.mp.                                                          |
| 60. apolipoprotein B48/                                                   | 60. exp waist circumference/                                            |
| 61. (apo* a1 or apo*a 1 or apo* a i or apo* ai).mp.                       | 61. (waist adj3 (circumference* or ratio*)).mp.                         |
| 62. (proapolipoprotein adj1 (ai or a1 or a i or a-1)).mp.                 | 62. glucose/                                                            |
| 63. waist circumference/                                                  | 63. glucose.mp.                                                         |
| 64. (waist adj3 (circumference* or ratio*)).mp.                           | 64. blood pressure*.mp.                                                 |
| 65. glucose/                                                              | 65. BMI.mp.                                                             |
| 66. glucose*.mp.                                                          | 66. glucose intolerance/                                                |
| 67. blood pressure/                                                       | 67. exp insulin resistance/                                             |
| 68. blood pressure*.mp.                                                   | 68. (insulin adj2 (resistance or sensitivity)).mp.                      |
| 69. BMI.mp.                                                               | 69. 29 or 37                                                            |
| 70. glucose intolerance/                                                  | 70. or/38-68                                                            |
| 71. insulin resistance/                                                   | 71. controlled clinical trial.pt.                                       |
| 72. (insulin adj2 (resistance or sensitivity)).mp.                        | 72. randomized controlled trial.pt.                                     |
| 73. or/39-72                                                              | 73. random*.mp.                                                         |
| 74. randomized controlled trial/                                          | 74. rct*.mp.                                                            |
| 75. "controlled clinical trial (topic)"/ or exp "clinical trial (topic)"/ | 75. Random Allocation/                                                  |
| 76. randomization/                                                        | 76. randomized controlled trials as topic/                              |
| 77. random*.mp.                                                           | 77. clinical trial*.mp.                                                 |
| 78. rct*.mp.                                                              | 78. clinical trial*.pt.                                                 |
| 79. exp clinical trial/                                                   | 79. exp Clinical Trials as Topic/                                       |
| 80. ((singl* or doubl* or tripl* or trebl*) adj3 (blind* or mask*)).mp.   | 80. exp clinical trial/                                                 |
| 81. "systematic review"/                                                  | 81. ((singl* or doubl* or tripl* or trebl*) adj3 (blind* or mask*)).mp. |
| 82. systematic review*.mp.                                                | 82. systematic review*.mp.                                              |
| 83. meta analysis/                                                        | 83. meta analys?s.mp.                                                   |
| 84. meta analys?s.mp.                                                     | 84. or/71-83                                                            |
| 85. or/74-84                                                              | 85. or/23-69                                                            |
| 86. (13 or 23) and (30 or 38 or 73) and 85                                | 86. 22 and 84 and 85                                                    |
| 87. limit 86 to (english or german or portuguese or spanish)              | 87. limit 86 to (english or german or portuguese or spanish)            |
| 88. animals/ not (humans/ and animals/)                                   | 88. animals/ not (humans/ and animals/)                                 |
| 89. 87 not 88                                                             | 89. 87 not 88                                                           |
| 90. remove duplicates from 89                                             | 90. remove duplicates from 89                                           |
