# Supplementary material for: Effects of oral contraceptives on metabolic parameters in adult premenopausal women: a meta-analysis
Source: PubMed Central journal article supplement (PMC7576645; doi:10.1530/ec-20-0423), 2020-09-10
Supplement: supplementary_table_2.pdf [file supplementary_table_2.pdf]

**Supplemental Table 2.** Changes in metabolic outcomes after use of oral contraceptives containing different progestins, before or after removing studies with high risk of bias (ROB) (n=10 studies).

| Progestin      | Outcome | N studies (participants), complete study sample | pMD (95%CI), complete study sample | N studies (participants), excluding high ROB studies | pMD (95%CI), excluding high ROB studies |
|----------------|---------|-------------------------------------------------|------------------------------------|------------------------------------------------------|-----------------------------------------|
| Cyproterone    | BMI     | 16 (350)                                        | 0.07 (-0.36, 0.22)                 | 14 (307)                                             | -0.10 (-0.39, 0.20)                     |
|                | Glucose | 13 (283)                                        | -2.74 (-4.81, -0.67)               | 12 (267)                                             | -3.39 (-5.72, -1.07)                    |
|                | TG      | 24 (560)                                        | 25.7 (14.4, 34.9)                  | 20 (440)                                             | 26.9 (19.2, 34.6)                       |
|                | HDL     | 22 (480)                                        | 6.51 (3.12, 9.9)                   | 20 (430)                                             | 6.72 (2.81, 10.6)                       |
|                | LDL     | 23 (527)                                        | 0.89 (-4.38, 6.16)                 | 19 (406)                                             | -1.11 (-6.42, 4.21)                     |
|                | HOMA    | 10 (242)                                        | -0.31 (-0.76, 0.15)                | 7 (202)                                              | -0.19 (-0.48, 0.10)                     |
| Chlormadinone  | BMI     | 2 (32)                                          | 0.35 (-1.5, 2.21)                  | 2 (32)                                               | 0.35 (-1.5, 2.21)                       |
|                | Glucose | 2 (32)                                          | -1.84 (-5.93, 2.24)                | 2 (32)                                               | -1.84 (-5.93, 2.24)                     |
|                | TG      | 2 (32)                                          | 35.1 (3.41, 66.8)                  | 2 (32)                                               | 35.1 (3.41, 66.8)                       |
|                | HDL     | 2 (32)                                          | 9.6 (4.51, 14.7)                   | 2 (32)                                               | 9.6 (4.51, 14.7)                        |
|                | LDL     | 2 (32)                                          | -0.76 (-13.7, 12.1)                | 2 (32)                                               | -0.76 (-13.7, 12.1)                     |
|                | HOMA    | -                                               | -                                  | -                                                    | -                                       |
| Desogestrel    | BMI     | 8 (211)                                         | 0.19 (-0.36, 0.73)                 | 8 (211)                                              | 0.19 (-0.36, 0.73)                      |
|                | Glucose | 9 (281)                                         | 1.53 (-0.56, 3.61)                 | 9 (281)                                              | 1.53 (-0.56, 3.61)                      |
|                | TG      | 22 (537)                                        | 27.4 (21.0-33.7)                   | 21 (517)                                             | 26.8 (20.2, 33.3)                       |
|                | HDL     | 26 (583)                                        | 6.79 (5.12, 8.46)                  | 24 (563)                                             | 6.08 (4.90, 7.26)                       |
|                | LDL     | 27 (582)                                        | 3.84 (-1.13, 8.81)                 | 25 (562)                                             | 1.38 (-2.98, 5.74)                      |
|                | HOMA    | 2 (91)                                          | 0.34 (0.0, 0.69)                   | 2 (91)                                               | 0.34 (0.0, 0.69)                        |
| Drospirenone   | BMI     | 9 (274)                                         | -0.60 (-1.04, -0.16)               | 8 (202)                                              | -0.04 (-0.68, 0.61)                     |
|                | Glucose | 9 (494)                                         | 1.35 (-1.59, 4.29)                 | 9 (494)                                              | 1.35 (-1.59, 4.29)                      |
|                | TG      | 15 (652)                                        | 33.3 (25.4, 41.1)                  | 14 (580)                                             | 35.5 (24.7, 46.3)                       |
|                | HDL     | 17 (731)                                        | 7.43 (5.1, 9.76)                   | 16 (659)                                             | 8.17 (5.46, 10.9)                       |
|                | LDL     | 17 (731)                                        | 6.15 (4.75, 7.55)                  | 16 (659)                                             | 8.36 (6.73, 9.98)                       |
|                | HOMA    | 6 (172)                                         | -0.14 (-0.54, 0.26)                | 6 (172)                                              | -0.14 (-0.54, 0.26)                     |
| Gestodene      | BMI     | 3 (109)                                         | 0.23 (-0.33, 0.79)                 | 3 (109)                                              | 0.23 (-0.33, 0.79)                      |
|                | Glucose | 2 (82)                                          | 1.64 (-0.94, 4.22)                 | 2 (82)                                               | 1.64 (-0.94, 4.22)                      |
|                | TG      | 15 (395)                                        | 25.4 (21.1, 29.7)                  | 14 (387)                                             | 25.5 (21.0, 30.0)                       |
|                | HDL     | 16 (387)                                        | 1.50 (0.24, 2.77)                  | 15 (379)                                             | 1.68 (0.28, 3.07)                       |
|                | LDL     | 12 (604)                                        | -1.96 (-4.33, 0.42)                | 12 (604)                                             | -1.96 (-4.33, 0.42)                     |
|                | HOMA    | -                                               | -                                  | -                                                    | -                                       |
| Levonorgestrel | BMI     | 5 (270)                                         | 0.12 (-0.29, 0.53)                 | 5 (270)                                              | 0.12 (-0.29, 0.53)                      |
|                | Glucose | 11 (322)                                        | -4.68 (-8.81, -0.55)               | 11 (322)                                             | -4.68 (-8.81, -0.55)                    |
|                | TG      | 38 (1106)                                       | 11.4 (7.67, 15.1)                  | 36 (1034)                                            | 11.3 (7.20, 15.4)                       |
|                | HDL     | 39 (1114)                                       | -4.01 (-5.3, -2.73)                | 38 (1060)                                            | -3.52 (-4.80, -2.25)                    |
|                | LDL     | 32 (996)                                        | 7.93 (5.69, 10.2)                  | 32 (996)                                             | 7.93 (5.69, 10.2)                       |
|                | HOMA    | 5 (165)                                         | 0.12 (-0.05, 0.28)                 | 5 (165)                                              | 0.12 (-0.05, 0.28)                      |
| Norgestimate   | BMI     | 3 (41)                                          | 0.19 (-0.64, 1.01)                 | 3 (41)                                               | 0.19 (-0.64, 1.01)                      |
|                | Glucose | 3 (41)                                          | 0.59 (-1.2, 2.39)                  | 3 (41)                                               | 0.59 (-1.2, 2.39)                       |
|                | TG      | 5 (100)                                         | 28.5 (25.5, 31.5)                  | 5 (100)                                              | 28.5 (25.5, 31.5)                       |
|                | HDL     | 3 (58)                                          | 2.58 (-1.78, 6.93)                 | 3 (58)                                               | 2.58 (-1.78, 6.93)                      |
|                | LDL     | 5 (83)                                          | 11.5 (3.82, 19.2)                  | 5 (83)                                               | 11.5 (3.82, 19.2)                       |
|                | HOMA    | -                                               | -                                  | -                                                    | -                                       |
